# Supplementary material
Source: ML conference proceedings conference paper supplement (https://openreview.net/forum?id=NtDXCDvkXJ)
Supplement: supplementary_material [file attachment]

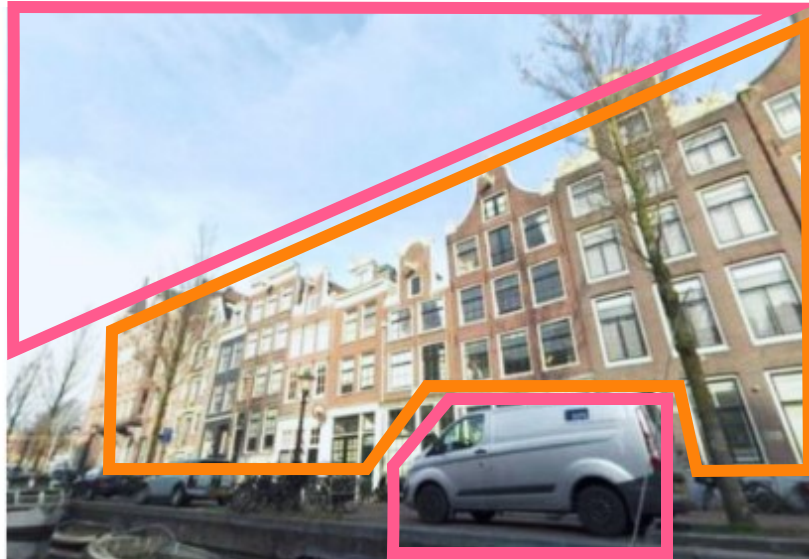

An Input Image

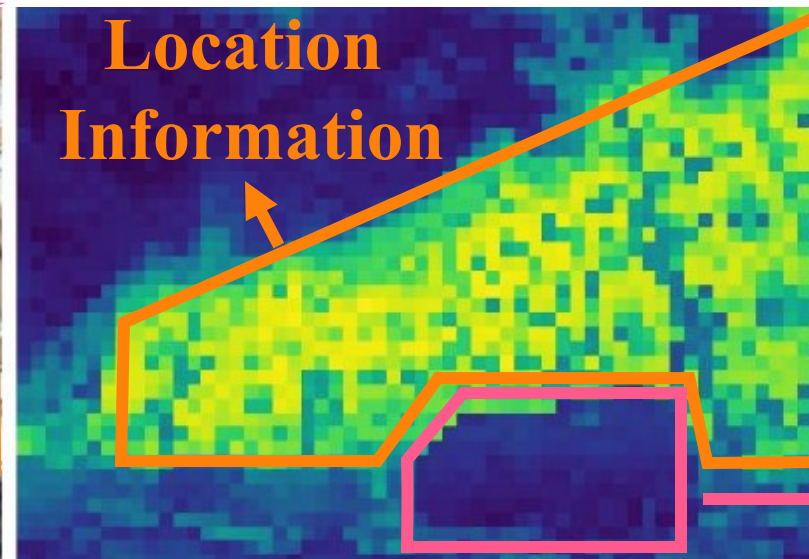

The feature map weighted by 1<sup>st</sup> PCA

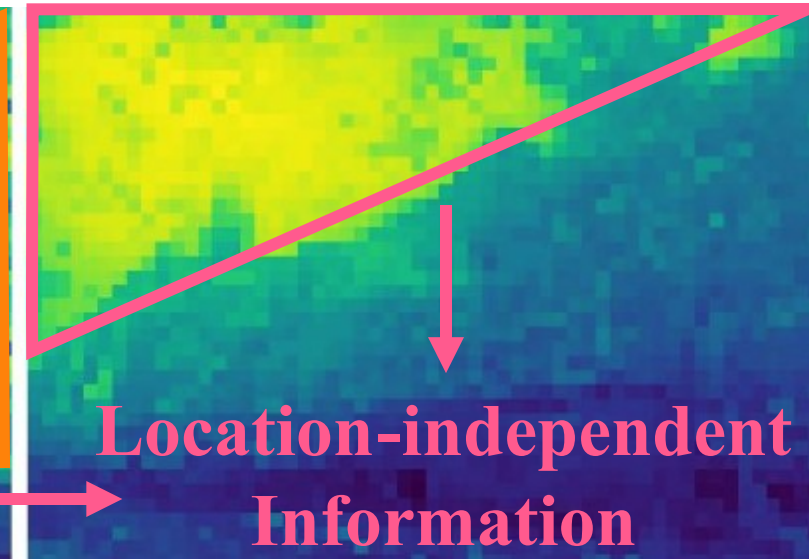

The feature map weighted by 2<sup>nd</sup> PCA

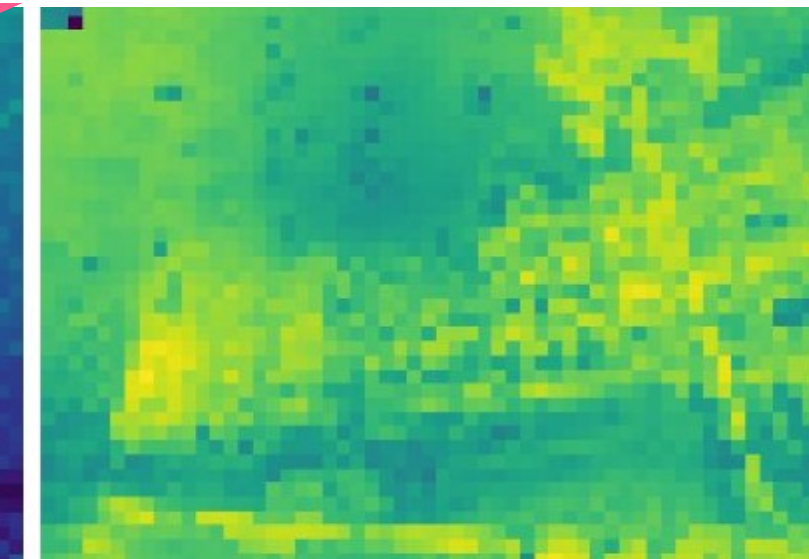

The feature map weighted by GCA
